# Supplementary material
Source: publisher figshare collection journal article supplement (https://diabetesjournals.figshare.com/ndownloader/files/35063554)

**Supplementary Appendix S1** **
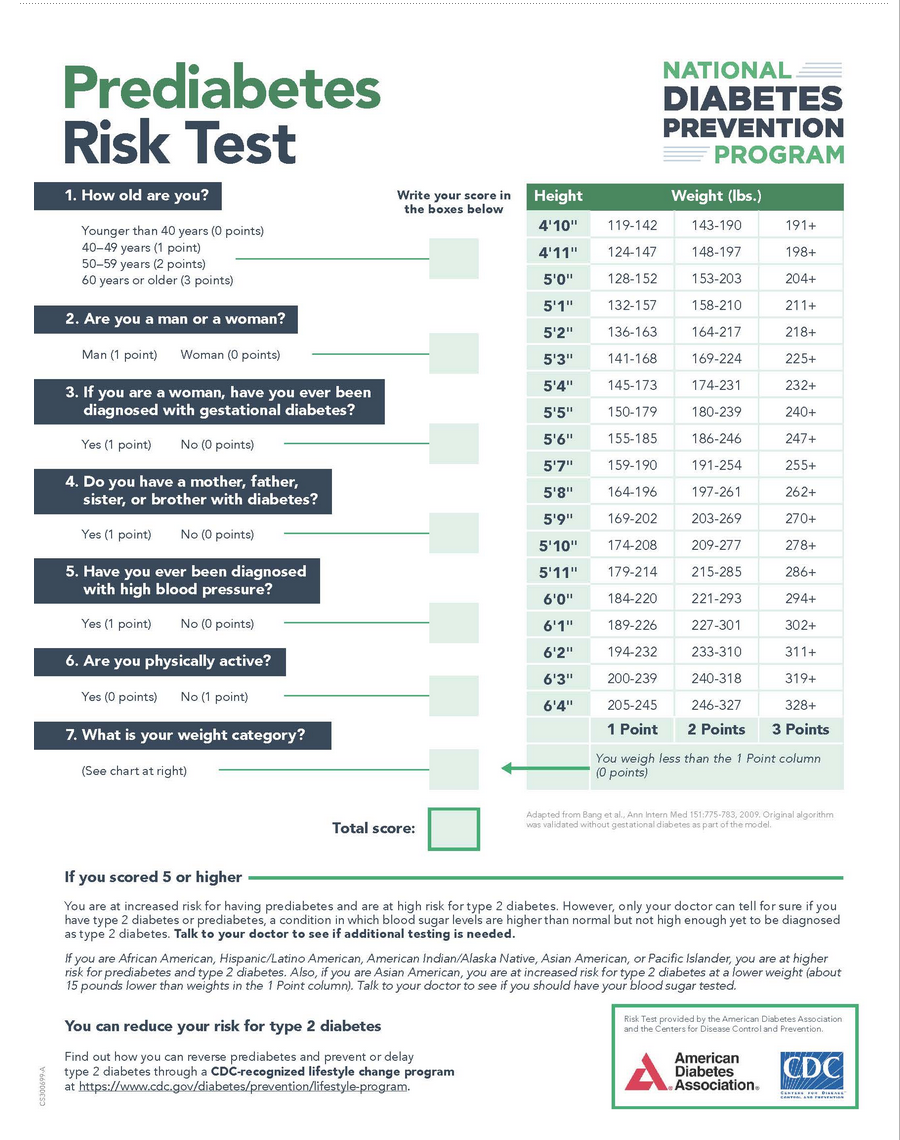
**

Supplement: Supplementary file 1 [file 35063554]
